# Supplementary material for: Using single molecule Molecular Inversion Probes as a cost-effective, high-throughput sequencing approach to target all genes and loci associated with macular diseases
Source: bioRxiv or medRxiv preprint supplement (doi:10.1101/2022.03.17.22272534), 2022-03-24
Supplement: Supplementary file [file media-1.pdf]

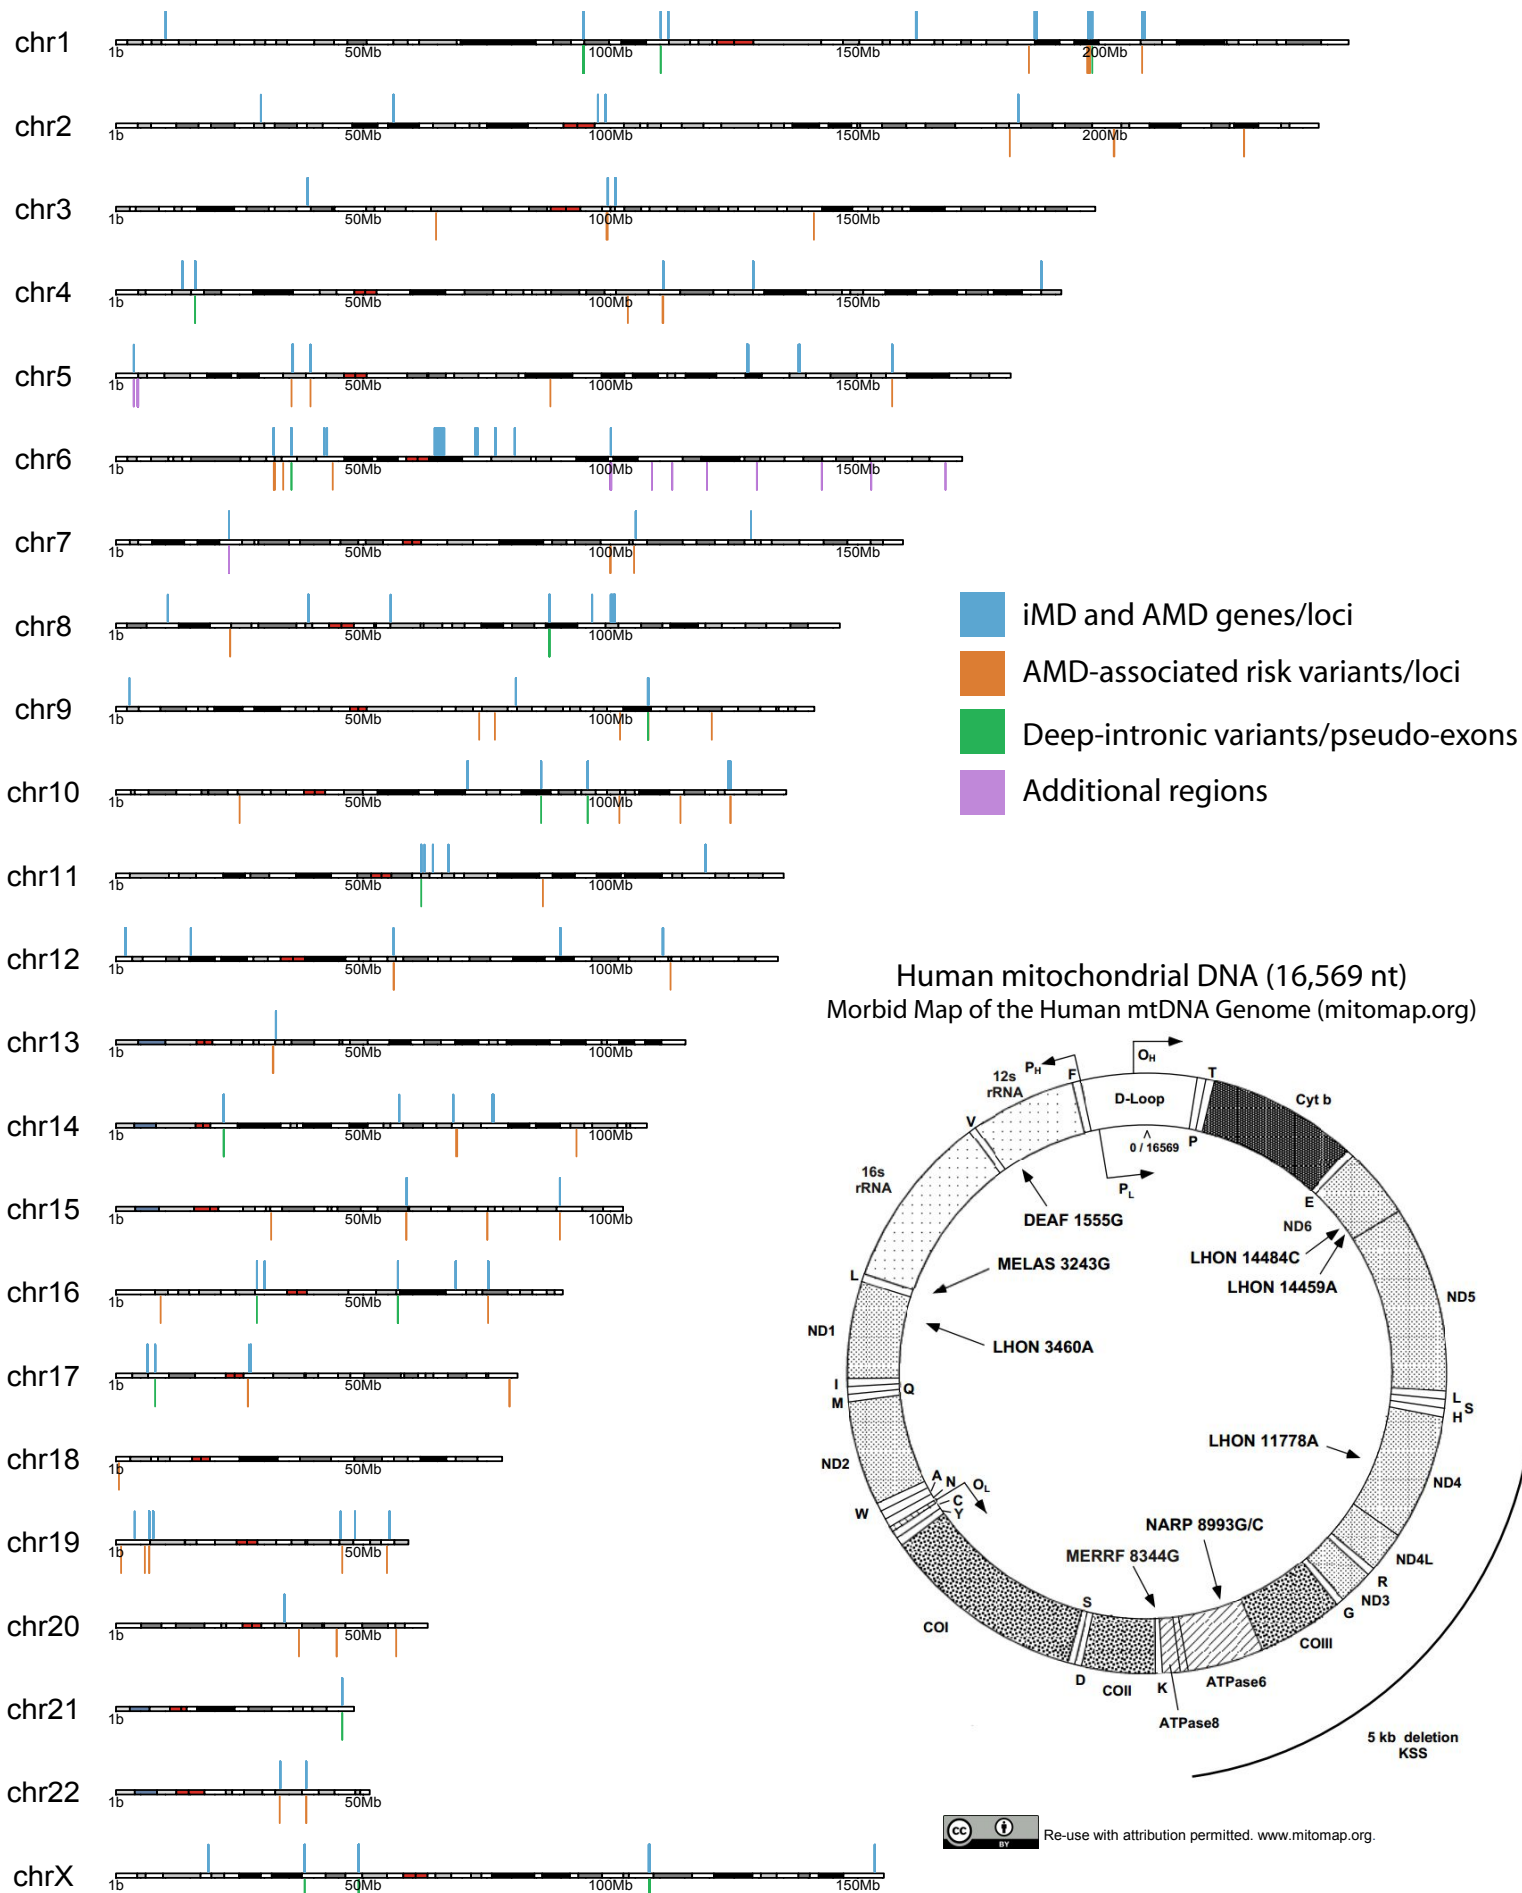

Supplementary Figure S1: Genomic distribution of nuclear and mitochondrial targets (hg19) in the MD-smMIPs panel. Horizontal bars present in nuclear DNA chromosomes depict genomic positions targeted by smMIPs. The entire mitochondrial DNA was included in the MD-smMIPs panel.
