# Supplementary material for: Using single molecule Molecular Inversion Probes as a cost-effective, high-throughput sequencing approach to target all genes and loci associated with macular diseases
Source: bioRxiv or medRxiv preprint supplement (doi:10.1101/2022.03.17.22272534), 2022-03-24
Supplement: Supplementary file [file media-3.pdf]

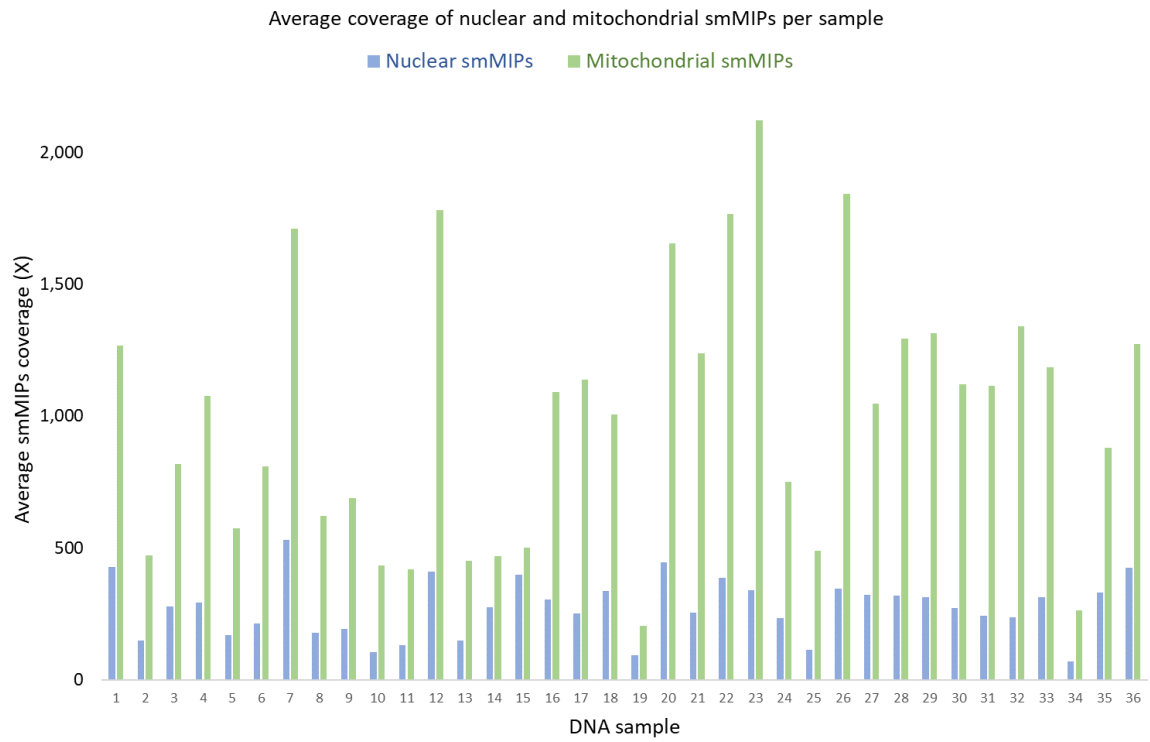

Supplementary Figure S3: The average coverage (x) of nuclear and mitochondrial smMIPs per sample in the MD test sequencing run.
